# Supplementary material for: Human intestinal organoids from Cronkhite-Canada syndrome patients reveal link between serotonin and proliferation
Source: JCI journal article supplement (doi:10.1172/jci166884), 2023-10-31
Supplement: sd1 [file 1]

301 Moved Permanently

# Moved Permanently

The document has moved here.
